# Supplementary material for: On the pathway of photoexcited electrons: probing photon-to-electron and photon-to-phonon conversions in silicon by ATR-IR
Source: Royal Society of Chemistry journal article supplement (doi:10.1039/c2cp41831b), 2012-01-01
Supplement: c2cp41831b.pdf [file c2cp41831b.pdf]

### Background Spectra and Phonon Peaks:

In this part, background spectrum with laser and without laser is shown as FigureSI-1, FigureSI-2 and FigureSI-3.

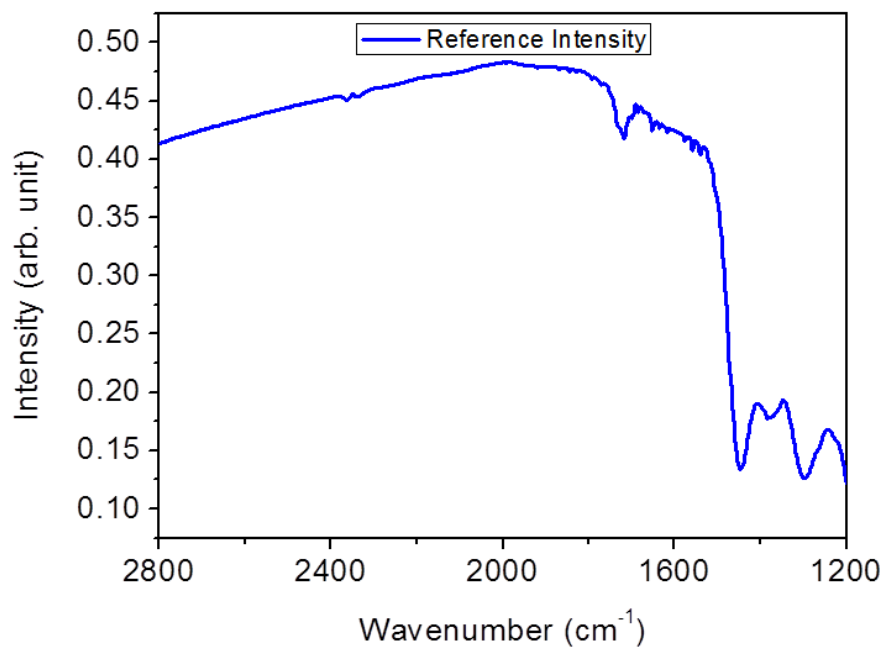

Figure-SI1: Background Spectra

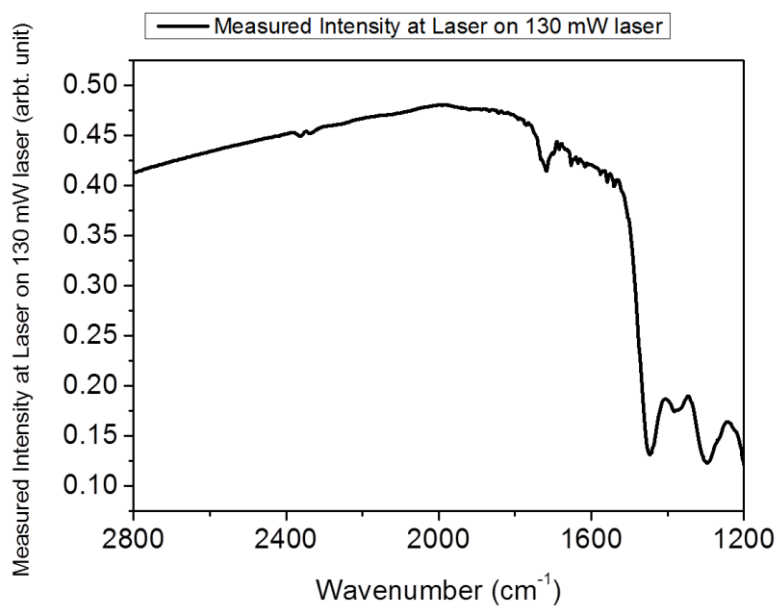

Figure-SI2: Background Spectra

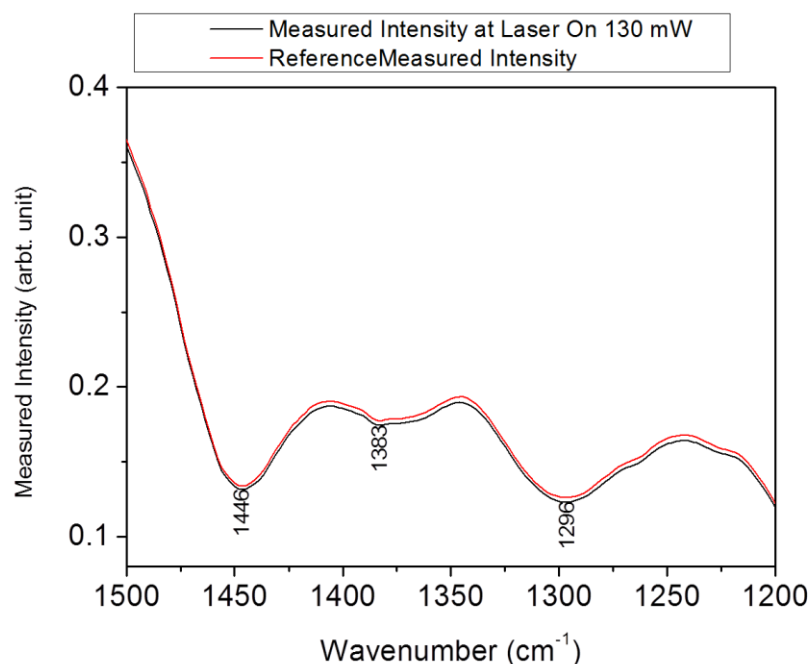

**Figure-SI3:** Background Spectra and phonon peaks between range  $1500\text{cm}^{-1}$  and  $1200\text{cm}^{-1}$

### Calculation of Penetration Depth at 1064 nm photon on silicon:

The absorption coefficient ( $\alpha$ ) for a 1064 nm photon is about<sup>1,2</sup>  $10\text{ cm}^{-1}$ .

Light intensity at any depth can be calculated as follows:

$$I(z) = I_0 e^{-\alpha z}$$

Where  $z$  is the depth,  $I(z)$  is the light intensity at a given depth,  $I_0$  is the initial light intensity.

Penetration depth is defined as the depth at which initial intensity reduces to  $1/e$  (37%).

As a result:

$$100 = 37 e^{(-10 \times z)}$$

From this equation  $z$  can be calculated as 0.99 mm.

In addition, our Silicon wafer is  $530\text{ }\mu\text{m}$  thick so at the bottom of wafer, the relative intensity can be calculated to amount to 58%.

### Fitting of Free Carrier Absorption Region:

In order to fit the free carrier absorption to the spectrum, the wavenumber range  $1500\text{ cm}^{-1}$  to  $2800\text{ cm}^{-1}$  (wavelength range  $6.66\text{ }\mu\text{m}$  –  $3.57\text{ }\mu\text{m}$ ) is selected, because in this region there is no phonon absorption.

The Drude model states that  $\alpha = k \lambda^2 N$

We measure Absorbance with our setup and we can relate absorbance as:

$$A = L \alpha$$

where L is the interaction distance between attenuated total light and laser light.

Finally;

$$A = L k \lambda^2 N$$

Fitting function of  $y = a x^2$  is used, where  $a = L k N$

For fitting, The Levenber-Marquart (LMA) error minimization algorithm is used and Fitted functions can be seen in Figure-3 in black.

Some parameters of the fit are shown below for the mentioned interval wavenumber range  $1500 \text{ cm}^{-1}$  to  $2800 \text{ cm}^{-1}$  (wavelength range  $6.66 \mu\text{m} - 3.57 \mu\text{m}$ )

Fitted Curve:  $y = a \lambda^2$  (a refers to  $L k N (\text{cm}^{-2})$  in the Drude model)

| Illumination Power (mW) | $L k N (\text{cm}^{-2})$ | Standard Error           | Adj. R-Square |
|-------------------------|--------------------------|--------------------------|---------------|
| 50                      | $5.05142 \times 10^{-5}$ | $2.35432 \times 10^{-7}$ | 0.9095        |
| 90                      | $9.22127 \times 10^{-5}$ | $4.34271 \times 10^{-7}$ | 0.92127       |
| 130                     | $1.88363 \times 10^{-4}$ | $3.94204 \times 10^{-7}$ | 0.97444       |

## Calculating Phonon Absorption:

The phonon absorption peaks are seen in FigureSI-4 These spectra are obtained by subtracting free carrier absorption plots (shown as black in Figure-2 from experimental data in Figure-2. After that, background correction is performed.

Figure SI-4: Phonon Absorption peaks1. M. A. Green and M. J. Keevers, *Prog Photovoltaics*, 1995, **3**, 189-192.

2. R. Schnabel, M. Britzger, F. Bruckner, O. Burmeister, K. Danzmann, J. Duck, T. Eberle, D. Friedrich, H. Luck, M. Mehmet, R. Nawrodt, S. Steinlechner and B. Willke, in *8th Edoardo Amaldi Conference on Gravitational Waves*, eds. Z. Marka and S. Marka, Iop Publishing Ltd, Bristol, 2010, vol. 228.
